# Supplementary material for: Concordance among Swedish, German, Danish, and UK EQ-5D-3L Value Sets: Analyses of Patient-Reported Outcomes in the Swedish Hip Arthroplasty Register
Source: MDPI journal article supplement (doi:10.3390/jcm10184205), 2021-09-17
Supplement: s1 [file s1]

**Concordance among Swedish, German, Danish, and UK EQ-5D-3L value sets:  
analyses of patient-reported outcomes in the Swedish Hip Arthroplasty Register**

Fitsum Sebsibe Teni<sup>1\*</sup>, Ola Rolfson<sup>1,2,3</sup>, Jenny Berg<sup>1</sup>, Reiner Leidl<sup>4,5</sup>, Kristina Burström<sup>1,6</sup>

<sup>1</sup>Health Outcomes and Economic Evaluation Research Group, Stockholm Centre for Healthcare Ethics, Department of Learning Informatics, Management and Ethics (LIME), Karolinska Institutet, Stockholm, Sweden

<sup>2</sup>Department of Orthopaedics, Institute of Clinical Sciences, Sahlgrenska Academy, University of Gothenburg, Gothenburg, Sweden

<sup>3</sup>Swedish Hip Arthroplasty Register, Gothenburg, Sweden

<sup>4</sup>Institute for Health Economics and Health Care Management, Helmholtz Zentrum München, German Research Center for Environmental Health, Neuherberg, Germany

<sup>5</sup>Munich Center of Health Sciences, Ludwig-Maximilians University, Munich, Germany

<sup>6</sup>Equity and Health Policy Research Group, Department of Public Health Sciences, Karolinska Institutet, Stockholm, Sweden

\*Corresponding author

Health Outcomes and Economic Evaluation research group, Stockholm Centre for Healthcare Ethics, Department of Learning Informatics, Management and Ethics (LIME), Karolinska Institutet, Stockholm, Sweden

**Email:** fitsum.teni@ki.se

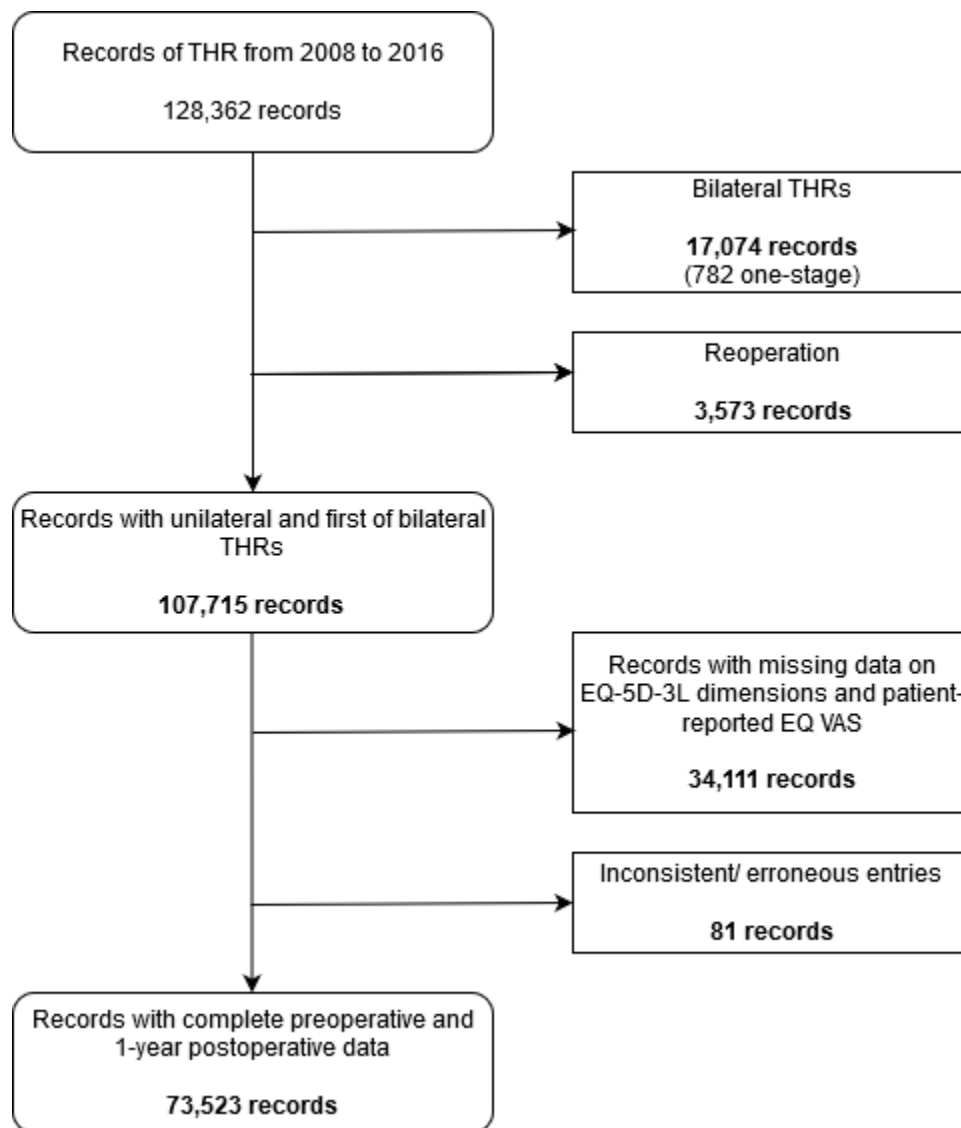

**Figure S1. Data retrieval procedure**

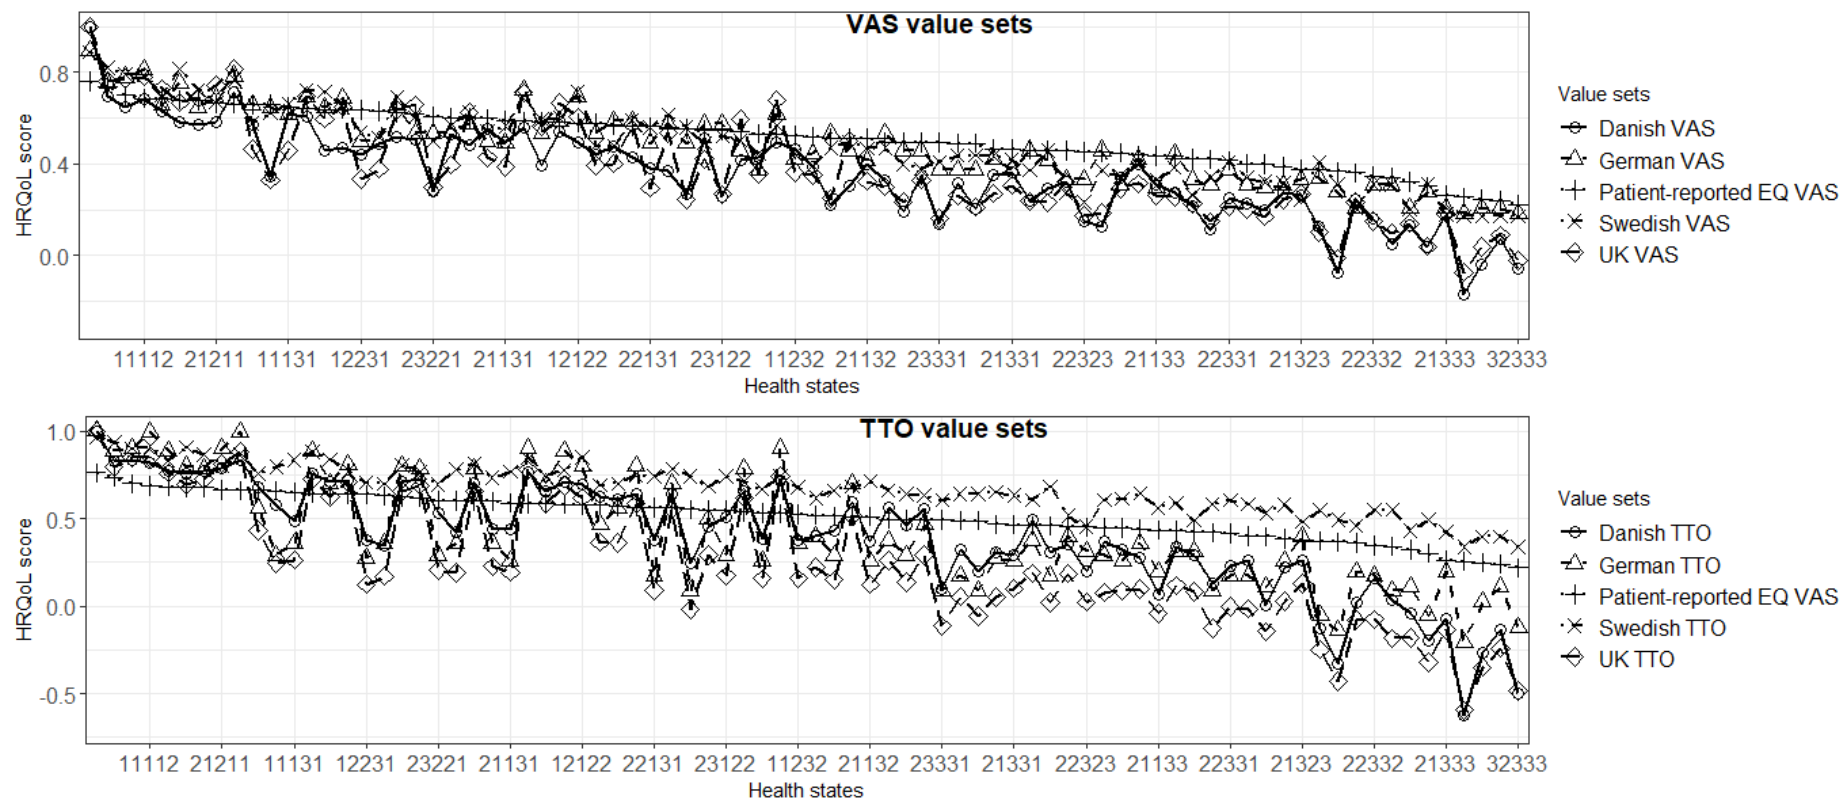

**Figure S2. Comparison of patient-reported EQ VAS score with EQ-5D indices based on the value sets preoperatively (ordered by patient-reported EQ VAS) (n=73,523)**

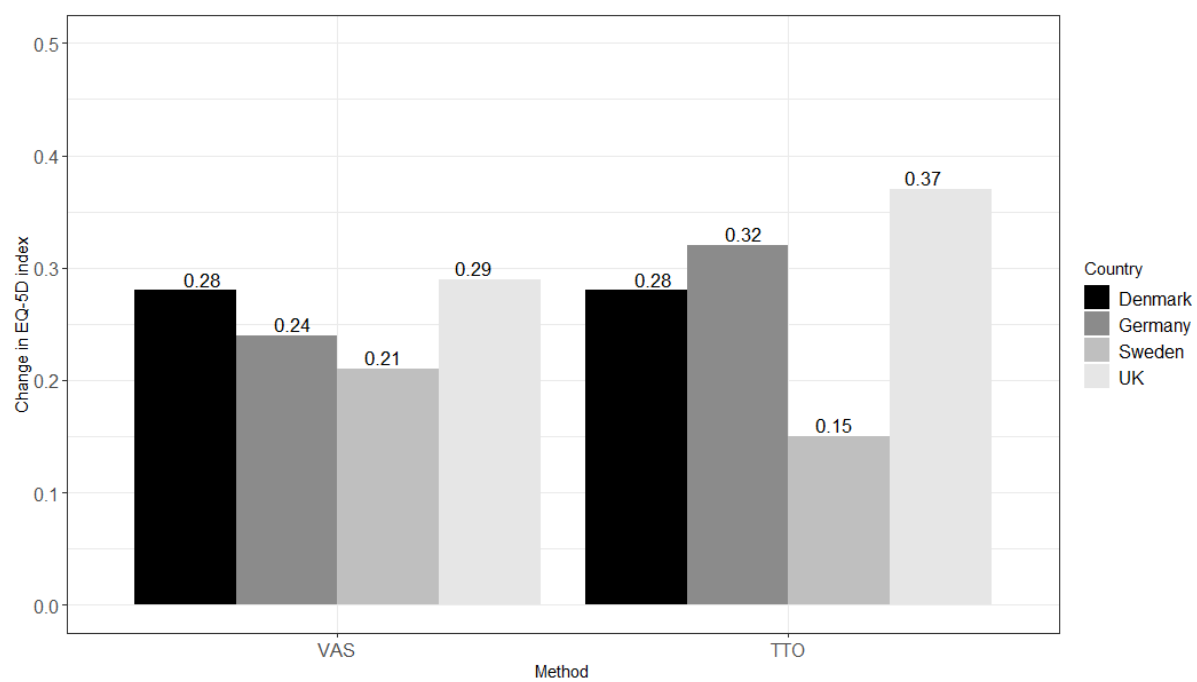

**Figure S3. Mean change in EQ-5D index among value sets by method, 1-year postoperative follow-up**

**Table S1. Description of the value sets compared in the present study**

| Parameters                       | Value set                |                           |                                              |                                      |                          |                            |                      |                                      |
|----------------------------------|--------------------------|---------------------------|----------------------------------------------|--------------------------------------|--------------------------|----------------------------|----------------------|--------------------------------------|
|                                  | Swedish VAS <sup>a</sup> | German VAS <sup>b</sup>   | Danish VAS                                   | UK VAS                               | Swedish TTO              | German TTO                 | Danish TTO           | UK TTO                               |
| Perspective                      | Experience-based         | Experience-based          | Hypothetical                                 | Hypothetical                         | Experience-based         | Hypothetical               | Hypothetical         | Hypothetical                         |
| Number of health states          | 148                      | 49 in 2006 and 58 in 2007 | 16 for each participant in 2 rounds of eight | 45                                   | 148                      | 36                         | 46                   | 42                                   |
| Value for the health state 11111 | 0.887                    | 0.893                     | 1.000                                        | 1.000                                | 0.969                    | 1.000                      | 1.000                | 1.000                                |
| Value for the health state 33333 | 0.172                    | 0.184                     | -0.167                                       | -0.073                               | 0.340                    | -0.205                     | -0.624               | -0.594                               |
| Sample size employed             | Approximately 45,000     | Nearly 2,000              | 1179                                         | 3,395                                | Approximately 45,000     | 339                        | 1,332                | 3,395                                |
| Time of data collection          | Surveys in 2004 and 2006 | Surveys in 2006 and 2007  | Winter 1999/2000                             | August to December 1993              | Surveys in 2004 and 2006 | October 1997 to March 1998 | Spring 2000          | August to December 1993              |
| Model employed/ chosen           | Ordinary least squares   | Generalized linear model  | Random effects model                         | Generalized least squares regression | Ordinary least squares   | Additive linear model      | Random effects model | Generalized least squares regression |

<sup>a</sup>Scores divided by 100 to compare value sets    <sup>b</sup>Final model was based on 2006 survey data

References: Burström et al, 2014; Leidl and Reitmeir, 2011; Szende et al, 2007; Greiner et al, 2005; Wittrup-Jensen, 2009; Dolan, 1997

**Table S2. Pairwise comparisons of value sets undergone by method, perspective and country in the present study**

| <b>Comparison</b> | <b>Value sets compared</b>                                                                                                                                                                       |
|-------------------|--------------------------------------------------------------------------------------------------------------------------------------------------------------------------------------------------|
| Method            | Swedish VAS vs. Swedish TTO<br>Danish VAS vs. Danish TTO<br>UK VAS vs. UK TTO                                                                                                                    |
| Perspective       | Swedish VAS vs. Danish VAS<br>Swedish VAS vs. UK VAS<br>German VAS vs. Danish VAS<br>German VAS vs. UK VAS<br>Swedish TTO vs. German TTO<br>Swedish TTO vs. Danish TTO<br>Swedish TTO vs. UK TTO |
| Country           | Swedish VAS vs. German VAS<br>Danish VAS vs. UK VAS<br>German TTO vs. Danish TTO<br>German TTO vs. UK TTO<br>Danish TTO vs. UK TTO                                                               |

**Table S3. Demographic and clinical characteristics of THR patients by sex preoperatively (n=73,523)**

| Variable                        | Sex         |        |             |        |             |        |
|---------------------------------|-------------|--------|-------------|--------|-------------|--------|
|                                 | Total       |        | Men         |        | Women       |        |
|                                 | %           | n      | %           | n      | %           | n      |
| <b>Age (years)[mean(SD)]</b>    | 68.2 (10.3) |        | 67.0 (10.1) |        | 69.2 (10.2) |        |
| <b>Age group (years)</b>        |             |        |             |        |             |        |
| <50                             | 4.6         | 3,408  | 5.8         | 1,839  | 3.8         | 1,569  |
| 50-59                           | 13.4        | 9,852  | 15.6        | 4,957  | 11.7        | 4,895  |
| 60-69                           | 34.3        | 25,215 | 36.1        | 11,458 | 32.9        | 13,757 |
| 70-79                           | 34.6        | 25,443 | 32.2        | 10,219 | 36.4        | 15,224 |
| 80-98                           | 13.1        | 9,605  | 10.3        | 3,281  | 15.1        | 6,324  |
| <b>BMI category<sup>a</sup></b> |             |        |             |        |             |        |
| Underweight                     | 0.7         | 489    | 0.2         | 56     | 1.0         | 433    |
| Normal weight                   | 29.6        | 21,783 | 23.8        | 7,572  | 34.0        | 14,211 |
| Overweight                      | 42.2        | 31,061 | 48.5        | 15,408 | 37.5        | 15,653 |
| Obese group I                   | 17.6        | 12,946 | 18.5        | 5,886  | 16.9        | 7,060  |
| Obese group II                  | 4.4         | 3,200  | 3.9         | 1,229  | 4.7         | 1,971  |
| Obese group III                 | 0.9         | 653    | 0.6         | 187    | 1.1         | 466    |
| Missing                         | 4.6         | 3,391  | 4.5         | 1,416  | 4.7         | 1,975  |
| <b>ASA Class</b>                |             |        |             |        |             |        |
| Class I                         | 25.0        | 18,402 | 26.5        | 8,423  | 23.9        | 9,979  |
| Class II                        | 57.8        | 42,517 | 55.0        | 17,464 | 60.0        | 25,053 |
| Class III                       | 13.7        | 10,050 | 14.9        | 4,727  | 12.7        | 5,323  |
| Class IV                        | 0.3         | 227    | 0.4         | 120    | 0.3         | 107    |
| Missing                         | 3.2         | 2,327  | 3.2         | 1,020  | 3.1         | 1,307  |
| <b>Diagnosis</b>                |             |        |             |        |             |        |
| Primary OA <sup>b</sup>         | 92.5        | 68,022 | 92.9        | 29,508 | 92.2        | 38,514 |
| Other <sup>c</sup>              | 7.4         | 5,473  | 7.0         | 2,235  | 7.8         | 3,238  |
| Missing                         | 0.0         | 28     | 0.0         | 11     | 0.0         | 17     |
| <b>Type of surgery</b>          |             |        |             |        |             |        |
| Unilateral                      | 83.5        | 61,389 | 84.9        | 26,961 | 82.4        | 34,428 |
| Bilateral                       | 16.5        | 12,134 | 15.1        | 4,793  | 17.6        | 7,341  |

a BMI categories: Underweight: <18.5; Normal: 18.5-24.9; Overweight: 25.0-29.9; Obese group I: 30.0-34.9; Obese group II: 35.0-39.9; Obese group III: > 40

b Osteoarthritis

c Other – Other secondary osteoarthritis, femoral head necrosis, sequele after childhood disease in the hip joint, inflammatory joint disease, other

**Table S4. The forty most frequent health profiles recorded among THR patients pre- and 1 year postoperatively (n=73,523)**

| Preoperative |               |             |                       | 1-year postoperative |               |             |                       |
|--------------|---------------|-------------|-----------------------|----------------------|---------------|-------------|-----------------------|
| Health state | n             | %           | Cumulative percentage | Health state         | n             | %           | Cumulative percentage |
| 21121        | 11,873        | 16.1        | 16.1                  | 11111                | 27,843        | 37.9        | 37.9                  |
| 21221        | 8,650         | 11.8        | 27.9                  | 11121                | 10,516        | 14.3        | 52.2                  |
| 21231        | 5,588         | 7.6         | 35.5                  | 21121                | 8,734         | 11.9        | 64.1                  |
| 21232        | 5,300         | 7.2         | 42.7                  | 21221                | 4,040         | 5.5         | 69.5                  |
| 21222        | 5,205         | 7.1         | 49.8                  | 21222                | 3,477         | 4.7         | 74.3                  |
| 21122        | 4,064         | 5.5         | 55.3                  | 21122                | 2,866         | 3.9         | 78.2                  |
| 21131        | 3,689         | 5.0         | 60.3                  | 11122                | 1,934         | 2.6         | 80.8                  |
| 22232        | 3,501         | 4.8         | 65.1                  | 21111                | 1,733         | 2.4         | 83.2                  |
| 11121        | 2,751         | 3.7         | 68.9                  | 11112                | 1,331         | 1.8         | 85.0                  |
| 22231        | 2,159         | 2.9         | 71.8                  | 22222                | 1,227         | 1.7         | 86.6                  |
| 22221        | 2,132         | 2.9         | 74.7                  | 11221                | 1,044         | 1.4         | 88.1                  |
| 22222        | 2,081         | 2.8         | 77.5                  | 22221                | 799           | 1.1         | 89.1                  |
| 21132        | 1,972         | 2.7         | 80.2                  | 21232                | 790           | 1.1         | 90.2                  |
| 22332        | 1,623         | 2.2         | 82.4                  | 11222                | 500           | 0.7         | 90.9                  |
| 21332        | 1,328         | 1.8         | 84.2                  | 21231                | 436           | 0.6         | 91.5                  |
| 21331        | 1,003         | 1.4         | 85.6                  | 22232                | 423           | 0.6         | 92.1                  |
| 22121        | 789           | 1.1         | 86.7                  | 11211                | 347           | 0.5         | 92.5                  |
| 22331        | 711           | 1.0         | 87.6                  | 22121                | 347           | 0.5         | 93.0                  |
| 11122        | 573           | 0.8         | 88.4                  | 21211                | 333           | 0.5         | 93.5                  |
| 11221        | 555           | 0.8         | 89.2                  | 21131                | 279           | 0.4         | 93.8                  |
| 21321        | 541           | 0.7         | 89.9                  | 21112                | 263           | 0.4         | 94.2                  |
| 11111        | 523           | 0.7         | 90.6                  | 12111                | 215           | 0.3         | 94.5                  |
| 21233        | 472           | 0.6         | 91.2                  | 22122                | 214           | 0.3         | 94.8                  |
| 21322        | 441           | 0.6         | 91.8                  | 12121                | 212           | 0.3         | 95.1                  |
| 22233        | 434           | 0.6         | 92.4                  | 21132                | 212           | 0.3         | 95.4                  |
| 22333        | 424           | 0.6         | 93.0                  | 22322                | 159           | 0.2         | 95.6                  |
| 22131        | 419           | 0.6         | 93.6                  | 21223                | 158           | 0.2         | 95.8                  |
| 22122        | 388           | 0.5         | 94.1                  | 22332                | 153           | 0.2         | 96.0                  |
| 11131        | 333           | 0.5         | 94.6                  | 21322                | 144           | 0.2         | 96.2                  |
| 22132        | 314           | 0.4         | 95.0                  | 21332                | 140           | 0.2         | 96.4                  |
| 22322        | 272           | 0.4         | 95.4                  | 21212                | 134           | 0.2         | 96.6                  |
| 21223        | 228           | 0.3         | 95.7                  | 22233                | 126           | 0.2         | 96.7                  |
| 22321        | 223           | 0.3         | 96.0                  | 22231                | 117           | 0.2         | 96.9                  |
| 21111        | 215           | 0.3         | 96.3                  | 12221                | 116           | 0.2         | 97.1                  |
| 11222        | 210           | 0.3         | 96.5                  | 21321                | 111           | 0.2         | 97.2                  |
| 21333        | 208           | 0.3         | 96.8                  | 21233                | 105           | 0.1         | 97.4                  |
| 21133        | 152           | 0.2         | 97.0                  | 22223                | 104           | 0.1         | 97.5                  |
| 21123        | 129           | 0.2         | 97.2                  | 22333                | 82            | 0.1         | 97.6                  |
| 11231        | 127           | 0.2         | 97.4                  | 21123                | 76            | 0.1         | 97.7                  |
| 22223        | 105           | 0.1         | 97.5                  | 12222                | 73            | 0.1         | 97.8                  |
| <b>Sum</b>   | <b>71,705</b> | <b>97.5</b> |                       | <b>Sum</b>           | <b>71,913</b> | <b>97.8</b> |                       |



**Table S5. Spearman's rank correlation and Lin's CCC tests of the full 243 health profiles between EQ-5D indices based on the value sets (n= 243)**

| Value sets compared         | $r_s^a$ | 95% CI <sup>b</sup> | Lin's CCC | 95% CI       |
|-----------------------------|---------|---------------------|-----------|--------------|
| <b>Method</b>               |         |                     |           |              |
| Swedish VAS vs. Swedish TTO | 0.96    | [0.96, 0.98]        | 0.55      | [0.50, 0.60] |
| Danish VAS vs. Danish TTO   | 0.88    | [0.84, 0.91]        | 0.76      | [0.72, 0.79] |
| UK VAS vs. UK TTO           | 0.96    | [0.95, 0.97]        | 0.70      | [0.66, 0.73] |
| <b>Perspective</b>          |         |                     |           |              |
| Swedish VAS vs. Danish VAS  | 0.76    | [0.69, 0.81]        | 0.53      | [0.46, 0.58] |
| Swedish VAS vs. UK VAS      | 0.76    | [0.69, 0.81]        | 0.55      | [0.48, 0.60] |
| German VAS vs. Danish VAS   | 0.73    | [0.66, 0.78]        | 0.44      | [0.38, 0.50] |
| German VAS vs. UK VAS       | 0.79    | [0.74, 0.84]        | 0.46      | [0.40, 0.52] |
| Swedish TTO vs. German TTO  | 0.62    | [0.53, 0.70]        | 0.25      | [0.21, 0.30] |
| Swedish TTO vs. Danish TTO  | 0.84    | [0.80, 0.88]        | 0.29      | [0.25, 0.33] |
| Swedish TTO vs. UK TTO      | 0.78    | [0.71, 0.83]        | 0.18      | [0.15, 0.21] |
| <b>Country</b>              |         |                     |           |              |
| Swedish VAS vs. German VAS  | 0.86    | [0.82, 0.89]        | 0.85      | [0.81, 0.88] |
| Danish VAS vs. UK VAS       | 0.96    | [0.95, 0.97]        | 0.92      | [0.90, 0.94] |
| German TTO vs. Danish TTO   | 0.90    | [0.86, 0.92]        | 0.88      | [0.84, 0.90] |
| German TTO vs. UK TTO       | 0.95    | [0.93, 0.96]        | 0.80      | [0.76, 0.83] |
| Danish TTO vs. UK TTO       | 0.98    | [0.96, 0.98]        | 0.86      | [0.83, 0.88] |

<sup>a</sup> Spearman's rank correlation coefficient

<sup>b</sup> Bootstrapped 95% CI
